# Psychiatric Services

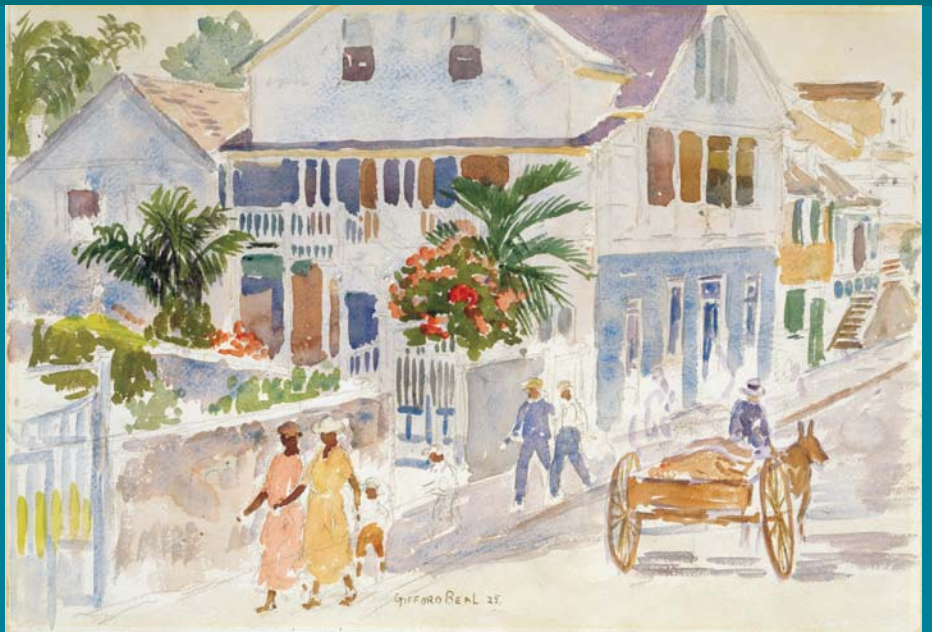

An intervention to increase productivity among older workers with depression  
Do health plans on state exchanges comply with parity laws? A study in two states  
Updated estimates of unmet need for mental health treatment in the United States  
Use of quality measures in state Medicaid programs: an environmental scan
