Exceptional Careers with  
**THE SALARY  
YOU  
DESERVE**

**Staff Psychiatrist**  
**\$233,196 - \$287,592** annual salary  
**Welcome Bonus of \$10,000**  
**J-1 Waiver & H-1B Visa Sponsorship**

To learn more about our great careers, please contact  
**Dr. John Lindgren** at **209.351.7225** or  
**Psychiatry.Jobs@cdcr.ca.gov**.

For more information, please visit  
**www.ChangingPrisonHealthCare.org**

Enjoy the advantages of a 40-hour work week, a highly competitive salary, a retirement plan that vests in only five years, and all of the security and benefits that come with State employment. We have special opportunities available in multiple locations throughout California:

Central California: **Avenal State Prison, California State Prison - Corcoran, Kern Valley State Prison, Salinas Valley State Prison, Substance Abuse Treatment Facility**

Southern California: **California Correctional Institution**

California has a diverse economy and is a leader in green technology and job creation. Whether you choose the Central Valley, with its lush farmland, prestigious vineyards, and traditional small towns, or Southern California, home to year-round sunshine and the City of Los Angeles, you'll find the exceptional California lifestyle you've been wanting — with us!

California Department of Corrections & Rehabilitation

Ad#S5-CR/SR EOE

## Unmatched Growth Opportunities

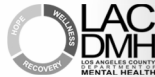

"The leaders [at DMH] are visionary and ahead of the curve... particularly when it comes to healthcare reform."

*Christopher Thompson, MD  
Supervising Psychiatrist*

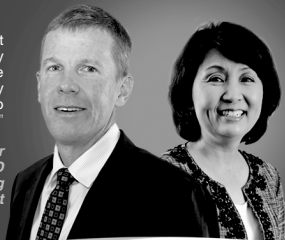

"The Department has a lot of innovative approaches to treating a very difficult population."

*Karen Lee, MD  
Regional Medical Director*

Join the largest, most dynamic mental health department in the nation. We are creating the future of mental health services, and we are seeking physicians who are ready to join our team and push the boundaries of traditional community practice.

To learn more about employment as a psychiatrist with the Los Angeles County Department of Mental Health, including salary and benefits, please visit:

**www.PsychiatristJobs.LA**

## Special Discounts for American Psychiatric Association Members on [www.appi.org](http://www.appi.org)

**20% Discount for APA Members**

**25% Discount for  
APA Members-in-Training (MITs)**

\*\*\*

**Subscribe to APP News**  
for the latest information on new titles, special offers,  
and other useful information.

Sign up @  
[www.appi.org/Pages/Signup.aspx](http://www.appi.org/Pages/Signup.aspx)

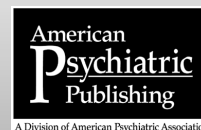

[www.appi.org](http://www.appi.org) Email: [appi@psych.org](mailto:appi@psych.org) Phone: 1-800-368-5777
